# Supplementary material
Source: Elsevier journal article supplement (https://www.sciencedirect.com/science/article/pii/S2603647920300889)
Supplement: mmc1 [file S2603647920300889:mmc1.docx]

**A. APÉNDICE 1: CRITERIOS PARA ACTIVAR EL CÓDIGO SEPSIS**

| **CRITERIOS SIRS** | **CRITERIOS Qsofa** |
| --- | --- |
| - Temperatura >38ºC o < 36ºC - Frecuencia cardiaca >90/min - Frecuencia respiratoria >20/min o PaCO2 < 32 mmHg - Leucocitos >12.000/mm3 o <4.000/mm3 o > 10% de formas inmaduras | - Frecuencia respiratoria >22/min - Alteración del nivel de conciencia - TAS ≤ 100 mmHg |

| **CRITERIOS MAYORES** | **CRITERIOS MENORES** |
| --- | --- |
| - Hipotensión - PAS < 90 mmHg o PAM < 65 mmHg - Desaturación (SatO2<90%) - Alteración del nivel de conciencia | - Fiebre > 38ºC o hipotermia < 36ºC - Taquicardia > 90 lpm - Taquipnea > 22 rpm |

Las alarmas/alertas automáticas de sospecha de sepsis que activaban el CS fueron:

- 2 o más criterios Qsofa
- 2 o más criterios SIRS
- 1 criterio mayor + 2 criterios menores
- 2 o más criterios mayores
- 1 criterio mayor + 1 criterio menor + 1 sospecha de infección
- 2 criterios menores + sospecha de infección

**B. APÉNDICE 2: PROTOCOLO DE ACTUACIÓN INICIAL ANTE SOSPECHA DE SEPSIS O SHOCK SÉPTICO**

| **ACTUACIÓN INICIAL ANTE SOSPECHA DE SEPSIS O SHOCK SÉPTICO** |
| --- |
| - Oxigenoterapia y/o ventilación mecánica, si precisa - Dos vías periféricas de grueso calibre (14-18G) - Si hipotensión o lactato ≥ 4 mmol/L, infusión de 30 ml/kg de cristaloides (Suero Fisiológico o Ringer Lactato) - Analítica: Bioquímica, equilibrio ácido-base venoso, hemograma, coagulación, gasometría - Hemocultivos seriados previo al tratamiento antibiótico - Antibiótico empírico según foco y factores de riesgo en la 1ª hora desde el diagnóstico - Control de diuresis, valorar sondaje vesical - Búsqueda de foco según sospecha clínica: - Toma de muestras - Pruebas de imagen - Drenaje si precisa en <12 horas |

1. Sangre venosa: Hematimetría y coagulación básica. Glucosa, creatinina, urea, iones, bilirrubina total, GPT (ALT), PCR, Procalcitonina y ácido láctico. Gasometría venosa, GRF.

2 Como el 1 pero con Gasometría arterial.

**C. APÉNDICE 3: RECOMENDACIONES DEL PROA PARA EL TRATAMIENTO EMPÍRICO EN SHOCK SÉPTICO**

| **SEPSIS ORIGEN ABDOMINAL** | |
| --- | --- |
| **COMUNITARIA** | |
| **Colecistitis, diverticulitis, peritonitis primaria** | |
| **De elección** | **Alergia betalactámicos** |
| **ERTAPENEM o PIPE/TAZO o [CEFTRIAXONA + METRONIDAZOL]** | **AZTREONAM O GENTAMICINA**  **+ METRONIDAZOL** |
| **Con factores de riesgo de mala evolución (Shock séptico, disfunción orgánica, inmunodepresión,> 65 a., asociada a cuidados sanitarios o peritonitis secundaria)** | |
| **De elección** | **Alergia betalactámicos** |
| **PIPE/TAZO O MEROPENEM**  **+ AMIKACINA****  **+ FLUCONAZOL (candina si shock séptico)** | **TIGECICLINA + AMIKACINA****  **+ FLUCONAZOL (candina si shock séptico)** |
| **NOSOCOMIAL (peritonitis postoperatoria y terciaria)** | |
| **De elección** | **Alergia betalactámicos** |
| **MEROPENEM + AMIKACINA****  **+ VANCOMICINA* O LINEZOLID O DAPTOMICINA**  **+ FLUCONAZOL (candina si shock séptico)** | **AZTREONAM + AMIKACINA****  **+ VANCOMICINA* o LINEZOLID O DAPTOMICINA**  **+ FLUCONAZOL (candina si shock séptico)** |

| **SEPSIS SIN FOCO** | |
| --- | --- |
| **SIN FACTORES DE RIESGO BMR** | |
| **De elección** | **Alergia betalactámicos** |
| **CEFALOSPORINA 3ª**  **+ AMIKACINA**** | **AZTREONAM + TIGECICLINA** |
| **CON FACTORES DE RIESGO BMR** | |
| **De elección** | **Alergia betalactámicos** |
| **PIPE/TAZO o MEROPENEM** | **AZTREONAM o CIPROFLOXACINO** |
| **+ AMIKACINA**** | **+ AMIKACINA**** |
| **+ VANCOMICINA O LINEZOLID O DAPTOMICINA** | **+ VANCOMICINA O LINEZOLID O DAPTOMICINA** |

| **SEPSIS ORIGEN RESPIRATORIO** | |
| --- | --- |
| **NEUMONIA ADQUIRIDA COMUNIDAD GRAVE** | |
| **NO riesgo de *Pseudomonas*** | |
| **De elección** | **Alergia betalactámicos** |
| **CEFTRIAXONA**  **+ AZITROMICINA O LEVOFLOXACINO** | **AZTREONAM + LEVOFLOXACINO** |
| **NEUMONIA ADQUIRIDA COMUNIDAD GRAVE, RIESGO DE *PSEUDOMONAS***  **Uso esteroides, FQ, EPOC grave, neo maligna, neutropenia, tratamiento Ab. 7 días, último mes, rápida progresión infiltrados.**  **O**  **NEUMONIA NOSOCOMIAL** | |
| **De elección** | **Alergia betalactámicos** |
| **CEFEPIME O PIPE/TAZO O MEROPENEM**  **+ CIPROFLOXACINO o LEVO o AMIKACINA****  **+/- LINEZOLID (riesgo SARM)** | **AZTREONAM +CIPROFLOXACINO + AMIKACINA****  **+/- LINEZOLID (riesgo SARM)** |

| **SEPSIS ORIGEN UROLOGICO** | |
| --- | --- |
| **Con FR (sondaje vesical, manipulación urológica, nosocomial, antibioterapia previa)** | |
| **De elección** | **Alergia betalactámicos** |
| **CARBAPENEM + AMIKACINA**** | **AZTREONAM + AMIKACINA****  **+ VANCOMICINA* O LINEZOLID** |
